# Supplementary material for: Structure of the type IV secretion system in different strains of Anaplasma phagocytophilum
Source: Springer Nature journal article supplement (doi:10.1186/1471-2164-13-678), 2012-11-29
Supplement: 12864_2012_4649_MOESM1_ESM.pdf [file 12864_2012_4649_MOESM1_ESM.pdf]

**Fig. S1**

ApHZ-VirB6-3 ML-SRSLLFFIAIVVLSSCGGTCIEPGAGVSSSSQEVQVPVYPDGADHKRPVTYWVHSGYRVGEKDELKITVDRTIDLCPLDTKAKPVAIKMYPEHFST--  
 ApDog1-VirB6-3 ML-SRSLLFFIAIVVLSSCGGTCIEPGAGVSSSSQEVQVPVYPDGADHKRPVTYWVHSGYRVGEKDELKITVDRTIDLCPLDTKAKPVAIKMYPEHFST--  
 ApDog2-VirB6-3 ML-SRSLLFFIAIVVLSSCGGTCIEPGAGVSSSSQEVQVPVYPDGADHKRPVTYWVHSGYRVGEKDELKITVDRTIDLCPLDTKAKPVAIKMYPEHFST--  
 ApJM-VirB6-3 ML-SRSLLFFIAIVVLSSCGGTCIEPGAGVSSSSQEVQVPVYPDGADHKRPVTYWVHSGYRVGEKDELKITVDRTIDLCPLDTKAKPVAIKMYPEHFST--  
 ApMRK-VirB6-3 ML-SRSLLFFIAIVVLSSCGGTCIEPGAGVSSSSQEVQVPVYPDGADHKRPVTYWVHSGYRVGEKDELKITVDRTIDLCPLDTKAKPVAIKMYPEHFST--  
 ApNorV2-VirB6-3 MLRLRLLFFIAIVVLSSCGGTCIEPGAGVSSSSQEVQVPVYPDGADHNRPTYWVHSGYRVGEKDELKITVDRTIDLCPLDTKAKPVAIKMYPEHFST--  
 ApVar1-VirB6-3 ML-L-RLFLLFFIAIVVLSSCGGTCIEPGAGVSSSSQEVQVPVYPDGADQKRPVTYWVNSGHRVGEKDELKITVDRTIDLCPLDTKAKPAVIRMYPEHFST--  
 ApNorV1-VirB6-3 MML-RLLLVIAIVVLSSCGGTCIEPGAGVSSSSQEVQVPVYPDGADQKRPVTYWVHSGHRVGEKDEIKITVDRTIDLCPLDTKAKPAVIRMYPEHLSISI  
 Consensus/80% ML..R.LLFFIAIVVLSSCGGTCIEPGAGVSSSSQEVQVPVYPDGADpKRPVTYWVHSGaRVGEKDELKITVDRTIDLCPDLDTKAKPssI+MYPEHFST..

ApHZ-VirB6-3 -PSTEFYDITYIDVQEGDQLRFSVLYDLSFPDCKEISREHSPVIFHNNEVIERDEACKKTVAIEELCLSGATSEVLGDGSKKGLLHVKDAKGECKEVPAG  
 ApDog1-VirB6-3 -PSTEFYDITYIDVQEGDQLRFSVLYDLSFPDCKEISREHSPVIFHNNEVIERDEACKKTVAIEELCLSGATSEVLGDGSKKGLLHVKDAKGECKEVPAG  
 ApDog2-VirB6-3 -PSTEFYDITYIDVQEGDQLRFSVLYDLSFPDCKEISREHSPVIFHNNEVIERDEACKKTVAIEELCLSGATSEVLGDGSKKGLLHVKDAKGECKEVPAG  
 ApJM-VirB6-3 -PSTEFYDITYIDVQEGDQLRFSVLYDLSFPDCKEISREHSPVIFHNNEVIERDEACKKTVAIEELCLSGATSEVLGDGSKKGLLHVKDAKGECKEVPAG  
 ApMRK-VirB6-3 -PSTEFYDITYIDVQEGDQLRFSVLYDLSFPDCKEISSEHSPVIFHNNEVIERDEACKKTVAIEELCLSGATSEVLGDGSKKGLLHVKDAKGECKELPAG  
 ApNorV2-VirB6-3 -PSTEFYDITYIDVQEGDQLRFSVLYDLSFPDCKEISSEHSPVIFHNNEVIERDEACKKTVAIEELCLSGATSEVLGDGSKKGLLHVKDAKGECKELPAG  
 ApVar1-VirB6-3 -PSTEFYDITYIDVQEGDQLRFGAVLYDLNFPNCKEISSEHSPVIFHNNEVIERQDSSCKKVAIEELCLSGATSEVLGDGSKKGLLHVKDAKGECKELPAG  
 ApNorV1-VirB6-3 EPSTEFYDITYIDVQEGDQLRFGAVLYDLNFPNCKEISSEHSPVIFHNNEVIERDGAACKKVAIEELCLSGALSEKVGEE--KKGLLYVKDSKGECKQALPES  
 Consensus/80% .PSTEFYDITYIDVQEGDQLRfttVLYDLSFPsCKEISpEHSPVIAhNNEVIFpDptCKKsV.hEELCLSGATSEVLGDGSKKGLLaVKDAKGECKELPAG

ApHZ-VirB6-3 VQIPRVGGSIIQTPRMQFPLGYIGVVDSSVSGELSFSYNNVITNGRIHDARVPKINMSPKLDQESCELLKGSNITLRLSNIDSIDQLKDRDAHNKHERSY  
 ApDog1-VirB6-3 VQIPRVGGSIIQTPRMQFPLGYIGVVDSSVSGELSFSYNNVITNGRIHDARVPKINMSPKLDQESCELLKGSNITLRLSNIDSIDQLKDRDAHNKHERSY  
 ApDog2-VirB6-3 VQIPRVGGSIIQTPRMQFPLGYIGVVDSSVSGELSFSYNNVITNGRIHDARVPKINMSPKLDQESCELLKGSNITLRLSNIDSIDQLKDRDAHNKHERSY  
 ApJM-VirB6-3 VQIPRVGGSIIQTPRMQFPLGYIGVVDSSVSGELSFSYNNVITNGRIHDARVPKINMSPKLDQESCELLKGSNITLRLSNIDSIDQLKDRDAHNKHERSY  
 ApMRK-VirB6-3 VQIPRVGGSIIQTPRMQFPLGYIGVVDSSVSGELSFSYNNVITNGRIHDARVPKINMSPKLDHESCELLKGSNITLRLSNIDSVDQLKDRDAHNKHERSY  
 ApNorV2-VirB6-3 VQIPRVGGSIIQTPRMQFPLGYIGVVDSSVSGELSFSYNNVITNGRIHDARVPKINMSPKLDHESCELLKGSNITLRLSNIDSVDQLKDRDAHNKHERSY  
 ApVar1-VirB6-3 VQIPRVGGSIIQTPRMQFPLGYIGVVDSSVSGELSFSYNNVITNGRIHDARVPKMNMSPKLDQESCELLKGSNITLRLSNIDSVDQLKDRDAHNKHERSY  
 ApNorV1-VirB6-3 VQIPRVGGSIIQTSRMQYPLGYIGVVDSSVSGELSFSYNNVITNGRIHDARVPKMNMSPKLDQESCELLKGSNITLRLSNIDSVDQLKDRDAHNKHRSY  
 Consensus/80% VQIPRVGGSIIQTPRMQFPLGYIGVVDSSVSGELSFSYNNVITNGRIHDARVPKbNMSPKLDpESCELLKGSNITLRLSNIDSIDQLKDRDAHNKHERSY

ApHZ-VirB6-3 TYGSNKAFITTKRFSGKPS.EE.EEKKQREKEEKIAALLSEYTEYDLNCHCGYVCKPSNQVDDDCIRSIVTMDGNVVCPTQTKFNGKDHEDAGNQOHNIP  
 ApDog1-VirB6-3 TYGSNKAFITTKRFSGKPS.EE.EEKKQREKEEKIAALLSEYTEYDLNCHCGYVCKPSNQVDDDCIRSIVTMDGNVVCPTQTKFNGKDHEDAGNQOHNIP  
 ApDog2-VirB6-3 TYGSNKAFITTKRFSGKPS.EE.EEKKQREKEEKIAALLSEYTEYDLNCHCGYVCKPSNQVDDDCIRSIVTMDGNVVCPTQTKFNGKDHEDAGNQOHNIP  
 ApJM-VirB6-3 TYGSNKAFITTKRFSGKPS.EE.EEKKQREKEEKIAALLSEYTEYDLNCHCGYVCKPSNQVDDDCIRSIVTMDGNVVCPTQTKFNGKDHEDAGNQOHNIP  
 ApMRK-VirB6-3 TYGSNKAFITTKRFSGKPS.EE.EEKKQREKEEKIAALLSEYTEYDLNCHCGYVCKPSNQVDDDCIRSIVTMDGNVVCPTQTKFNGKDHEDAGNQOHNIP  
 ApNorV2-VirB6-3 TYGSNKAFITTKRFSGKPLE.EE.EEKKQREKEEKIAALLSEYTEYDLNCHCGYVCKPSNQVDDDCIRSIVTMDGNVVCPTQTKFNGKDHEDAGNQOHNIP  
 ApVar1-VirB6-3 TYGSNKPFITTKRFSGKPS.EE.EEKKQREKEEKIAALLSEYTEYDLNCHCGYVCKPSNHVDDDCIRSIVTMDGNVVCPTQTKFNGKDDKDA-SQOHNIP  
 ApNorV1-VirB6-3 TDGDSKPFITTKRFSGKQLE.EE.EEKKQREKEEKIAALLSEYTEYDLNCHCGYITCKPSDKIDGSGVRSIVTMDGNVVCPTQTKFNSKDDDEGAIKQOHNIP  
 Consensus/80% TYGSNKsFTTKRFftKP.EE.EEKKQREKEEKIAALLSEYTEYDLNCHCGYVCKPSNPVDDDCIRSIVTMDGNVVCPTQTKFNGKDC.EEDAhsQQHNIP

cont. Fig. S1

ApHZ-VirB6-3 DIRGDLSP<sup>EAF</sup>ERSVSSLTGQHF<sup>GQN</sup>-VAQKDSVISVEKAYELAE<sup>GVI</sup>AVIVS<sup>IENGKK</sup>LPSDIAQY<sup>CNDH</sup>Q<sup>GKCKYL</sup>PEGIKSLKSSQ<sup>SGLTFE</sup>KGSL  
 ApDog1-VirB6-3 DIRGDLSP<sup>EAF</sup>ERSVSSLTGQHF<sup>GQN</sup>-VAQKDSVISVEKAYELAE<sup>GVI</sup>AVIVS<sup>IENGKK</sup>LPSDIAQY<sup>CNDH</sup>Q<sup>GKCKYL</sup>PEGIKSLKSSQ<sup>SGLTFE</sup>KGSL  
 ApDog2-VirB6-3 DIRGDLSP<sup>EAF</sup>ERSVSSLTGQHF<sup>GQN</sup>-VAQKDSVISVEKAYELAE<sup>GVI</sup>AVIVS<sup>IENGKK</sup>LPSDIAQY<sup>CNDH</sup>Q<sup>GKCKYL</sup>PEGIKSLKSSQ<sup>SGLTFE</sup>KGSL  
 ApJM-VirB6-3 DIRGDLSP<sup>EAF</sup>ERSVSSLTGQHF<sup>GQN</sup>-VAQKDSVISVEKAYELAE<sup>GVI</sup>AVIVS<sup>IENGKK</sup>LPSDIAQY<sup>CNDH</sup>Q<sup>GKCKYL</sup>PEGIKSLKSSQ<sup>SGLTFE</sup>KGSL  
 ApMRK-VirB6-3 DIRGDLSP<sup>EAF</sup>ERSVSSLTGQHF<sup>GQN</sup>-VAQKDSVISVEKAYELAE<sup>GVI</sup>AVIVS<sup>IENGKK</sup>LPSDIAQY<sup>CNDH</sup>Q<sup>GKCKYL</sup>PEGIKSLKSSQ<sup>SGLTFE</sup>KGSL  
 ApNorV2-VirB6-3 DIRGDLSP<sup>EAF</sup>ERSVSSLTGQRF<sup>GQND</sup>VAQND<sup>SVISVEKAYELAE</sup>GVI<sup>IENGKK</sup>AVIVS<sup>PEGGEVAKY</sup>CNDH<sup>QEKCKYL</sup>PEGIKSLKSSQ<sup>SGLTFE</sup>KGSL  
 ApVar1-VirB6-3 DIR-KMSQKDF<sup>SSVASI</sup>A----<sup>GQN</sup>-VLPK<sup>DTISVKTAYELAE</sup>GVI<sup>VENGKK</sup>AVIVS<sup>PEGGVAKY</sup>CNDH<sup>QEKCKYL</sup>PEGIKSLKSSQ<sup>SGLTFE</sup>KGSL  
 ApNorV1-VirB6-3 DVY-NMSP<sup>EDMKGLGALT</sup>----<sup>GQN</sup>-VLPK<sup>DTIGVKTAYELAE</sup>GVI<sup>VENGKK</sup>AVIVS<sup>PEGGVAEY</sup>CNDH<sup>QEKCKYL</sup>PEGIKSLKSSQ<sup>SGLTFE</sup>KGSL  
 Consensus/80% DIR.cbSPEsFA+SVtSLT...GQN.Vh.KDSSISVcpAYELAE<sup>GVI</sup>AVIVS<sup>IENGKK</sup>..tSlApY<sup>CNDH</sup>Q.KCKYLPEGIKSLKstQSGLTFEKGSL

ApHZ-VirB6-3 KLDSDYIAP<sup>CSGR</sup>LYLAYWPYF<sup>GELGKKVKERK</sup>GSEAAVVAAS<sup>GSSQRGLTVSR</sup>AKNYS<sup>ENSLLSALA</sup>QRRFFWKQ<sup>GMS</sup>SG<sup>SGGFLS</sup>SN<sup>DAGNTYV</sup>PLS  
 ApDog1-VirB6-3 KLDSDYIAP<sup>CSGR</sup>LYLAYWPYF<sup>GELGKKVKERK</sup>GSEAAVVAAS<sup>GSSQRGLTVSR</sup>AKNYS<sup>ENSLLSALA</sup>QRRFFWKQ<sup>GMS</sup>SG<sup>SGGFLS</sup>SN<sup>DAGNTYV</sup>PLS  
 ApDog2-VirB6-3 KLDSDYIAP<sup>CSGR</sup>LYLAYWPYF<sup>GELGKKVKERK</sup>GSEAAVVAAS<sup>GSSQRGLTVSR</sup>AKNYS<sup>ENSLLSALA</sup>QRRFFWKQ<sup>GMS</sup>SG<sup>SGGFLS</sup>SN<sup>DAGNTYV</sup>PLS  
 ApJM-VirB6-3 KLDSDYIAP<sup>CSGR</sup>LYLAYWPYF<sup>GELGKKVKERK</sup>GSEAAVVAAS<sup>GSSQRGLTVSR</sup>AKNYS<sup>ENSLLSALA</sup>QRRFFWKQ<sup>GMS</sup>SG<sup>SGGFLS</sup>SN<sup>DAGNTYV</sup>PLS  
 ApMRK-VirB6-3 KLDSDYIAP<sup>CSGR</sup>LYLAYWPYF<sup>GELGKKVKERK</sup>GSEAAVVAAS<sup>GSSQRGLTVSR</sup>AKNYS<sup>ENSLLSALA</sup>QRRFFWKQ<sup>GMS</sup>SG<sup>SGGFLS</sup>SN<sup>DAGNTYV</sup>PLS  
 ApNorV2-VirB6-3 KLDSDYIAP<sup>CSGR</sup>LYLAYWPYF<sup>GELGKKVKERK</sup>GSEAAVVAAS<sup>GSSQRGLTVSR</sup>AKNYS<sup>ENSLLSALA</sup>QRRFFWKQ<sup>GMS</sup>SG<sup>SGGFLS</sup>SN<sup>DAGNTYV</sup>PLS  
 ApVar1-VirB6-3 KLDSDYIAP<sup>CSGR</sup>LYLAYWPYSL<sup>GELGKKVKER</sup>RENNAA--<sup>VAA</sup>SGSS<sup>SSQRGLTVSR</sup>AKNYS<sup>ENSLLSALA</sup>QRRFFWKQ<sup>YMS</sup>FAS<sup>SGGFLS</sup>SN<sup>DAGNTYV</sup>PLS  
 ApNorV1-VirB6-3 KLDSDYIAP<sup>CSGR</sup>LYLAYWPYSL<sup>GELGKKVKER</sup>ESKAAV<sup>VASGSSQR</sup>GS<sup>SVSTK</sup>KYED<sup>ENSLLSALA</sup>QRRFFWKQ<sup>YMS</sup>FAS<sup>SGGFLS</sup>SN<sup>DAGNTYV</sup>PLS  
 Consensus/80% KLDSDYIAPGSGRLYLAYWP.bGELGKKVKERK.scAsVVAASGtSSQRGLTVSRAKNYS<sup>ENSLLSALA</sup>QRRFFWKQsMS.tSGGFLsSNDAGNsYVsLS

ApHZ-VirB6-3 RDEGIT<sup>TTISYS</sup>-VASAAT<sup>PVSAGK</sup>PASERRISVART<sup>GEDIA</sup>-VQGFYSLN<sup>VHRTC</sup>YATS<sup>GQKLYMYIGD</sup>TPPTALPGK<sup>QGAIP</sup>LDFEKINS<sup>SKS</sup>-DKEE  
 ApDog1-VirB6-3 RDEGIT<sup>TTISYS</sup>-VASAAT<sup>PVSAGK</sup>PASERRISVART<sup>GEDIA</sup>-VQGFYSLN<sup>VHRTC</sup>YATS<sup>GQKLYMYIGD</sup>TPPTALPGK<sup>QGAIP</sup>LDFEKINS<sup>SKS</sup>-DKEE  
 ApDog2-VirB6-3 RDEGIT<sup>TTISYS</sup>-VASAAT<sup>PVSAGK</sup>PASERRISVART<sup>GEDIA</sup>-VQGFYSLN<sup>VHRTC</sup>YATS<sup>GQKLYMYIGD</sup>TPPTALPGK<sup>QGAIP</sup>LDFEKINS<sup>SKS</sup>-DKEE  
 ApJM-VirB6-3 RDEGIT<sup>TTISYS</sup>-VASAAT<sup>PVSAGK</sup>PASERRISVART<sup>GEDIA</sup>-VQGFYSLN<sup>VHRTC</sup>YATS<sup>GQKLYMYIGD</sup>TPPTALPGK<sup>QGAIP</sup>LDFEKINS<sup>SKS</sup>-DKEE  
 ApMRK-VirB6-3 RDEGIT<sup>TTISYS</sup>-VASAAT<sup>PVSAGK</sup>PASERRISVART<sup>GEDIA</sup>-VQGFYSLN<sup>VHRTC</sup>YATS<sup>GQKLYMYIGD</sup>TPPTALPGK<sup>QGAIP</sup>LDFEKINS<sup>SKS</sup>-DKEE  
 ApNorV2-VirB6-3 RDEGIT<sup>TTISYS</sup>-IASAAMP<sup>VSAGNTAS</sup>ERRISVART<sup>GEDIA</sup>-VQGFYSLN<sup>VHRTC</sup>YATS<sup>GQKLYMYIGD</sup>TPPTALPGK<sup>QLGAI</sup>LDFEKINS<sup>SKG</sup>-DKEE  
 ApVar1-VirB6-3 HDEGATTISYS<sup>TVA</sup>AAAA<sup>PVSAGKTAS</sup>QARM<sup>SV</sup>AHTSENT<sup>TK</sup>VQGFYALN<sup>VHRTC</sup>YATS<sup>GQKLYMYIGD</sup>TPPTALPGK<sup>QGAIP</sup>LDFEKINS<sup>SKSD</sup>DKEE  
 ApNorV1-VirB6-3 HDEGATTISYS<sup>TVA</sup>AAAA<sup>PVSAGKTVS</sup>QSH<sup>ISVAR</sup>NSENT<sup>T</sup>-VQGFYSLN<sup>VHRTC</sup>YATS<sup>GQKLYMYIGD</sup>TPPTALPGK<sup>QGAIP</sup>LDFEEM<sup>NKS</sup>---KKE  
 Consensus/80% +DEGhTTISYS.VAtAAsPVSAGKsASppRISVARTtEshs.VQGFYSLNVHRTC<sup>YATS</sup>GQKLYMYIGDTPPTALPGKQpGAIPLDFEKINSskt.DKEE

ApHZ-VirB6-3 KEWSYKINS<sup>GA</sup>EKRQ-GYIYF<sup>GVDVDP</sup>G<sup>YEAKIKQ</sup>ANNS<sup>DNYYAVHLWVPKWT</sup>PIFSSFFN<sup>FLOQVLLH</sup>VLYG<sup>TDLP</sup>TMGQ<sup>DTKAVEASKVIGRAMS</sup>PEY  
 ApDog1-VirB6-3 KEWSYKINS<sup>GA</sup>EKRQ-GYIYF<sup>GVDVDP</sup>G<sup>YEAKIKQ</sup>ANNS<sup>DNYYAVHLWVPKWT</sup>PIFSSFFN<sup>FLOQVLLH</sup>VLYG<sup>TDLP</sup>TMGQ<sup>DTKAVEASKVIGRAMS</sup>PEY  
 ApDog2-VirB6-3 KEWSYKINS<sup>GA</sup>EKRQ-GYIYF<sup>GVDVDP</sup>G<sup>YEAKIKQ</sup>ANNS<sup>DNYYAVHLWVPKWT</sup>PIFSSFFN<sup>FLOQVLLH</sup>VLYG<sup>TDLP</sup>TMGQ<sup>DTKAVEASKVIGRAMS</sup>PEY  
 ApJM-VirB6-3 KEWSYKINS<sup>GA</sup>EKRQ-GYIYF<sup>GVDVDP</sup>G<sup>YEAKIKQ</sup>ANNS<sup>DNYYAVHLWVPKWT</sup>PIFSSFFN<sup>FLOQVLLH</sup>VLYG<sup>TDLP</sup>TMGQ<sup>DTKAVEASKVIGRAMS</sup>PEY  
 ApMRK-VirB6-3 KEWSYKINS<sup>GA</sup>EKRQ-GYIYF<sup>GVDVDP</sup>G<sup>YEAKIKQ</sup>ANNS<sup>DNYYAVHLWVPKWT</sup>PIFSSFFN<sup>FLOQVLLH</sup>VLYG<sup>TDLP</sup>TMGQ<sup>DTKAVEASKVIGRAMS</sup>PEY  
 ApNorV2-VirB6-3 KEWSYKINS<sup>GA</sup>KKQ-QGYIYF<sup>GVDVDP</sup>G<sup>YEAKIKQ</sup>ANNS<sup>DNYYAVHLWVPKWT</sup>PIFSSFFN<sup>FLOQVLLH</sup>VLYG<sup>TDLP</sup>TMGQ<sup>DTKAVEASKVIGRAMS</sup>PEY  
 ApVar1-VirB6-3 KEWSYKINS<sup>GA</sup>EKRQ-GYIYF<sup>GVDVDP</sup>G<sup>YEAKIKQ</sup>ANNS<sup>DNYYAVHLWVPKWT</sup>PIFSSFFN<sup>FLOQVLLH</sup>VLYG<sup>TDLP</sup>TMGQ<sup>DTKAVEASKVIGRAMS</sup>PEY  
 ApNorV1-VirB6-3 KEWSYKIN<sup>ADKDH</sup>KQKGYIYF<sup>GVA</sup>VDPA<sup>YEANIKKAS</sup>N<sup>TENY</sup>YS<sup>VHLWVPKWT</sup>PIFSSFFN<sup>LQCM</sup>LLH<sup>VLYG</sup>TDLP<sup>TMGQ</sup>DT<sup>RAVEAKA</sup>IG<sup>KVMS</sup>PEY  
 Consensus/80% KEWSYKINS<sup>GA</sup>-K+Q.GYIYF<sup>GVDVDP</sup>G<sup>YEAKIKQ</sup>ANNS<sup>DNYYAVHLWVPKWT</sup>PIFSSFFN<sup>FLOQVLLH</sup>VLYG<sup>TDLP</sup>TMGQ<sup>DTKAVEASKVIGRAMS</sup>PEY
