# Supplementary material for: Structure of the type IV secretion system in different strains of Anaplasma phagocytophilum
Source: Springer Nature journal article supplement (doi:10.1186/1471-2164-13-678), 2012-11-29
Supplement: 12864_2012_4649_MOESM2_ESM.pdf [file 12864_2012_4649_MOESM2_ESM.pdf]

**A.**

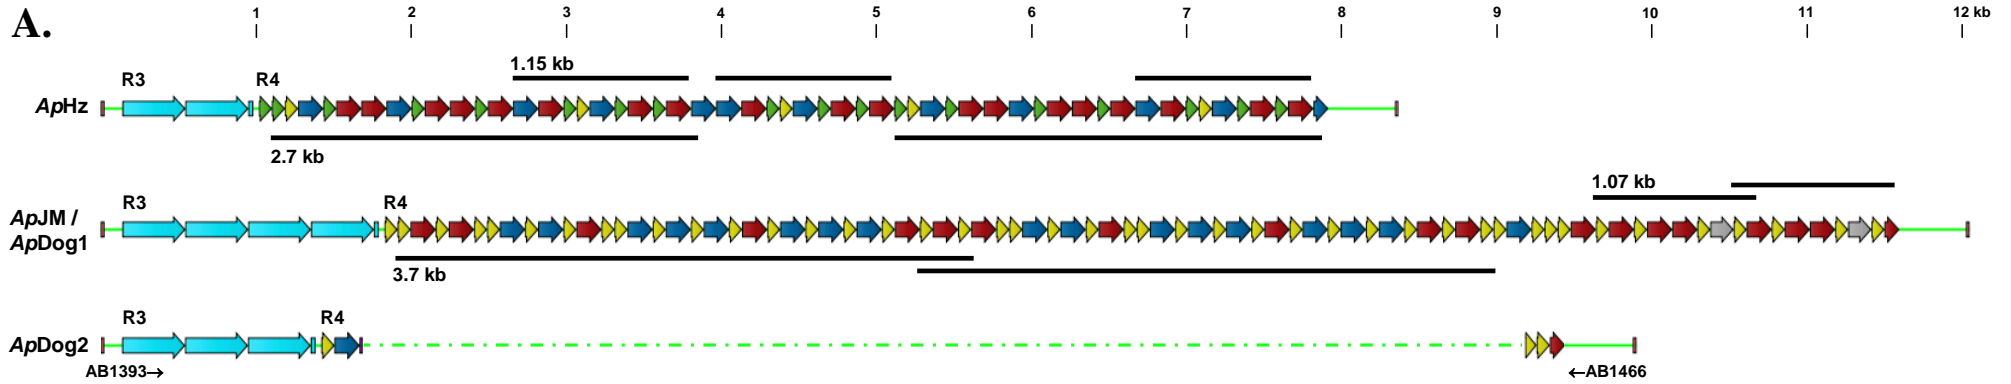

**B.**

```

T1a CAGGAGAAGGAT---GGTAATACTGCGACGGAA---CT---TCCT-----AGAGAA--GT 44
T1b CAGGAGAAGGAT---GGTAATACTGCGACGGAA---CT---TCCT-----AGAGAA--GT 44
T2a CAGGATGGTGATAAGGGTGATTTAAGGCCTGAAAGACTGGATCCTGATATAGGGGATGGT 60
T2b CAGGATGGTGATAAGGGTGATTTAAGGCCTGAAAGCTGGATCCTGATATAGGGGATGGT 60
T2c CAGGATGGTGATAAGGGTGATTTAAGGCCTGAAAGCTGGATCCTGATATAGGGGATGGT 60
*****      ***      *** *      * * * *      **      * * * *      * * * *      *

```

```

T1a AGTAC----- 84
T1b AGTAC----- 84
T2a AGTGCATAGAAGATGAGGTTGAGGTTAGATCTTCTAGGAGTAGTGAATCAACTGATAG 119
T2b AGTGCATAGAAGATGAGGTTGAGGTTAGATCTTCTAGGAGTAGTGAATCAACTGATAG 119
T2c AGTGCATAGAAGATGAGGTTGAGGTTAGATCTTCTAGGAGTAGTGAATCAACTGATAG 119
*** *

```

```

T1a -----CTGAAGCTACCGAGTATGGTACTAAACCTGATGAT 84
T1b -----CTGAAGCTACCTGAGTATGGTACTAAACCTGATGAT 84
T2a CGTGCCATCTGAAGTAACTGAACGTGATGCTCAACGTGATGAT 162
T2b CGTGCCATCTGAAGTAACTGAACGTGATGCTCAACGTGATGAT 162
T2c CGTGCCATCTGAAGTAACTGAA-----CGTGATGAT 150
*****      *** *      * * * *      * * * *      * * * *      *

```

**C.**

```

T1a/T1b QEKD-----GNTATELPREVVPEATEFYGTKPDD 28
T2a/T2b QDGDKGLRPERLDPDIGDGS AIEDEVEVRSRSESSTDSVPSEVTERDAQRDD 54
T2c      QDGDKGLRPERLDPDIGDGS AIEDEVEVRSRSESSTDSVPSEVTE----RDD 50
* : *      . . : * . * . * *      **

```
