# Supplementary material for: Structure of the type IV secretion system in different strains of Anaplasma phagocytophilum
Source: Springer Nature journal article supplement (doi:10.1186/1471-2164-13-678), 2012-11-29

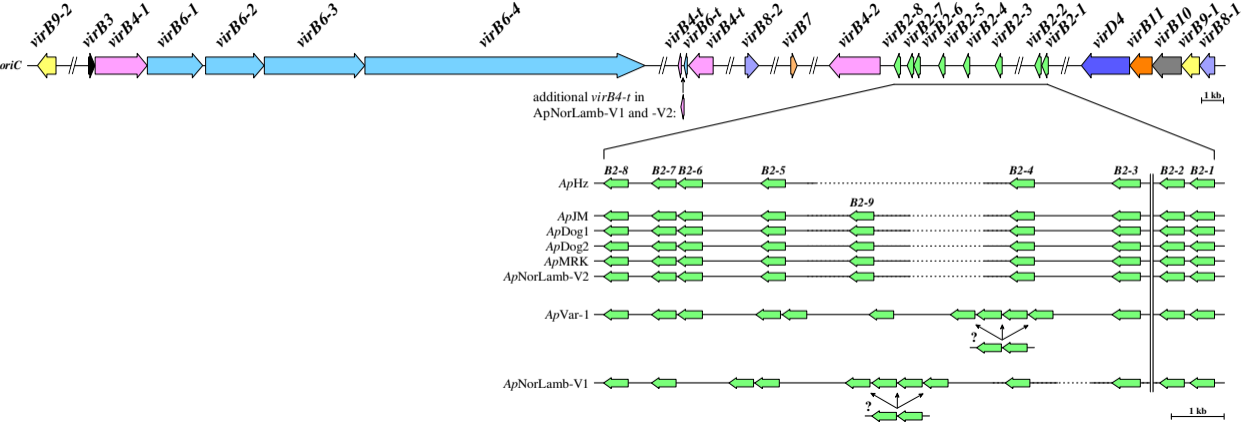

Supplement: 12864_2012_4649_MOESM3_ESM.pdf [file 12864_2012_4649_MOESM3_ESM.pdf]
